# Supplementary material for: Challenges in cyclometalation: steric effects leading to competing pathways and η1,η2-cyclometalated iridium(iii) complexes
Source: Royal Society of Chemistry journal article supplement (doi:10.1039/c8dt02639d), 2018-01-01
Supplement: c8dt02639d1.pdf [file c8dt02639d1.pdf]

Supporting Information

**Challenges in Cyclometalation: Steric Effects Leading to Competing Pathways and  $\eta^1, \eta^2$ -Cyclometalated Iridium(III) Complexes**

Houguang Jeremy Chen, Ronald Hong Xiang Teo, Jonathan Wong, Yongxin Li, Sumod A. Pullarkat, and Pak-Hing Leung\*

*Division of Chemistry & Biological Chemistry, School of Physical & Mathematical Sciences, Nanyang Technological University, Singapore 637371, Singapore*

Email: pakhing@ntu.edu.sg

## TABLE OF CONTENTS

|           |                                                                                                                                                                          |            |
|-----------|--------------------------------------------------------------------------------------------------------------------------------------------------------------------------|------------|
| <b>A.</b> | <b>General Considerations .....</b>                                                                                                                                      | <b>S3</b>  |
| <b>B.</b> | <b>Experimental .....</b>                                                                                                                                                | <b>S4</b>  |
| B1        | The Iridation Reaction of ( <i>R</i> )- <i>N,N</i> -Dimethyl-1-Naphthylethylamine ( <i>R</i> )- <b>L1</b> .....                                                          | S4         |
| B2        | The Iridation Reaction of ( <i>R</i> )- <i>N,N</i> -Dimethyl-1-Phenylethylamine ( <i>R</i> )- <b>L2</b> .....                                                            | S7         |
| B3        | The Cycloiridation of <i>N,N</i> -Dimethyl-1-Naphthylmethylamine <b>L3</b> .....                                                                                         | S8         |
| B4        | The Iridation Reaction of Deuterated <i>d</i> <sub>1</sub> - <i>rac</i> - <i>N,N</i> -Dimethyl-1-Naphthylethylamine <i>d</i> <sub>1</sub> - <i>rac</i> - <b>L1</b> ..... | S9         |
| <b>C.</b> | <b>NMR Spectroscopy Data .....</b>                                                                                                                                       | <b>S11</b> |
|           | Cycloiridated Complex ( <i>R</i> <sub>C</sub> , <i>R</i> <sub>N</sub> , <i>S</i> <sub>Ir</sub> )- <b>1</b> .....                                                         | S11        |
|           | Deuterated Cycloiridated Complex <i>d</i> <sub>1</sub> -( <i>R</i> <sub>C</sub> , <i>R</i> <sub>N</sub> , <i>S</i> <sub>Ir</sub> )- <b>1</b> .....                       | S12        |
|           | 1-Acetonaphthone <b>2</b> .....                                                                                                                                          | S14        |
|           | Coordinated Dimethylamine Iridium(III) Complex <b>3</b> .....                                                                                                            | S15        |
|           | Cycloiridated Complex <i>rac</i> - <b>4</b> .....                                                                                                                        | S16        |
|           | Cycloiridated Complex <i>rac</i> - <b>5</b> .....                                                                                                                        | S17        |
|           | 1-Ethyl-naphthalene <b>6</b> .....                                                                                                                                       | S18        |
|           | Deuterated <i>d</i> <sub>1</sub> -1-Ethyl-naphthalene <b>6</b> .....                                                                                                     | S19        |
|           | Acetophenone <b>7</b> .....                                                                                                                                              | S21        |
|           | Cycloiridated Complex <i>rac</i> - <b>8</b> .....                                                                                                                        | S22        |
|           | Cycloiridated Complex <i>rac</i> - <b>9</b> .....                                                                                                                        | S23        |
| <b>D.</b> | <b>X-Ray Crystallographic Data .....</b>                                                                                                                                 | <b>S24</b> |
|           | Cycloiridated Complex ( <i>R</i> <sub>C</sub> , <i>R</i> <sub>N</sub> , <i>S</i> <sub>Ir</sub> )- <b>1</b> .....                                                         | S24        |
|           | Cycloiridated Complex <i>rac</i> - <b>5</b> .....                                                                                                                        | S26        |
|           | Cycloiridated Complex <i>rac</i> - <b>9</b> .....                                                                                                                        | S28        |

## A GENERAL CONSIDERATIONS

Reactions involving air- or moisture-sensitive compounds were carried out by means of conventional Schlenk techniques under a positive pressure of nitrogen gas. Unless stated otherwise, chemicals and solvents were used as received from commercial vendors without further purification. When required, anhydrous solvents were freshly distilled and dried according to standard procedures prior to use.

Nuclear magnetic resonance (NMR) spectroscopy were recorded at Nanyang Technological University Division of Chemistry and Biological Chemistry Central Facilities Laboratory on the Bruker Avance III 400 (BBFO 400) spectrometer at 400 MHz for  $^1\text{H}$  NMR and 100 MHz for  $^{13}\text{C}$  NMR. Chemical shifts ( $\delta$ ) are quoted in ppm, and referenced to chemical shifts of residual solvent peaks for  $^1\text{H}$  and  $^{13}\text{C}$  NMR.

High resolution mass spectrometry *via* electrospray ionization (ESI) was performed on the Waters Q-ToF Premier spectrometer. Unless stated otherwise, acetonitrile was used as the solvent for the dissolution of compounds.

Elemental analysis was performed on the EuroVector Euro EA elemental analyzer at Nanyang Technological University Division of Chemistry and Biological Chemistry Central Facilities Laboratory.

Optical rotation studies were measured on the Jasco P-1030 polarimeter in a 0.1 dm polarimetry cell at the specified temperature using the D-line of sodium (589 nm) as the source of light. Unless stated otherwise, dichloromethane was used as the solvent for the dissolution of compounds.

## B EXPERIMENTAL

### B1 The Iridation Reaction of (*R*)-*N,N*-Dimethyl-1-Naphthylethylamine (*R*)-L1

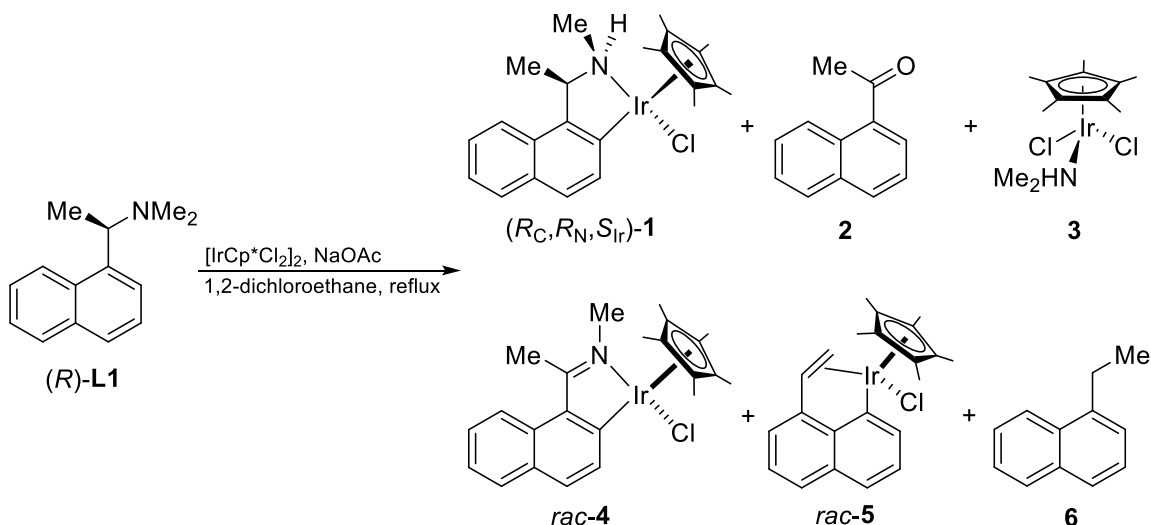

$[\text{IrCp}^*\text{Cl}_2]_2$  (100 mg, 0.125 mmol) and NaOAc (41 mg, 0.50 mmol) were added to a stirring solution of (*R*)-*N,N*-dimethyl-1-naphthylethylamine (*R*)-L1 (50 mg, 0.25 mmol) in 1,2-dichloroethane (5 mL). The reaction mixture was then reflux for 48 h. The crude reaction mixture was evaporated to dryness and purified directly by column chromatography on silica gel (refer to products on eluent system for column chromatography).

#### $(R_C, R_N, S_{Ir})\text{-}(1,2,3,4,5\text{-Pentamethylcyclopentadienyl})\{\kappa^2\text{-C,N}\}\text{-1-[1-(N-methylamino)ethyl]naphthyl} \text{iridium(III) chloride } (R_C, R_N, S_{Ir})\text{-1}$

Eluent System (Chromatography):  $\text{CH}_2\text{Cl}_2$ ; Yield: 5.5 mg (4%);  $[\alpha]_D$  (22 °C, *c* 0.5) =  $-102.1^\circ$ ;  $^1\text{H NMR}$  (400 MHz,  $\text{CD}_2\text{Cl}_2$ ):  $\delta$  1.24 (d,  $^3J_{\text{HH}} = 6.5$  Hz, 3H, ArCH( $\text{CH}_3$ )), 1.67 (s, 15H, Cp( $\text{CH}_3$ )), 3.02 (d,  $^3J_{\text{HH}} = 6.4$  Hz, 3H, NH( $\text{CH}_3$ )), 4.69 (dq,  $^3J_{\text{HH}} = 4.2$  Hz and 6.4 Hz, 1H, ArCH( $\text{CH}_3$ )), 5.02 (br s, 1H, NH( $\text{CH}_3$ )), 7.20-7.74 (m, 6H, ArH);  $^{13}\text{C NMR}$  (100 MHz,  $\text{CD}_2\text{Cl}_2$ ):  $\delta$  9.36 ( $\text{C}_5(\text{CH}_3)_5$ ), 17.39 (ArCH( $\text{CH}_3$ )N), 39.57 (NCH $_3$ ), 66.89 (ArCH( $\text{CH}_3$ )N), 87.35 ( $\text{C}_5(\text{CH}_3)_5$ ), 122.66 (aromatic carbon), 123.41 (aromatic carbon), 125.41 (aromatic carbon), 126.05 (aromatic carbon), 127.92 (aromatic carbon), 128.38 (aromatic carbon), 131.07 (aromatic carbon), 136.07 (aromatic carbon), 144.65 (aromatic carbon), 153.10 (aromatic carbon); HRMS (ESI)  $m/z$  [negative mode] calcd for  $\text{C}_{23}\text{H}_{29}\text{ClIrN}$  547.1618, found 547.1619; Anal. calcd for  $\text{C}_{23}\text{H}_{29}\text{ClIrN}$ : C, 50.49; H, 5.34; N, 2.56. Found: C, 50.02; H, 5.56; N, 2.31.

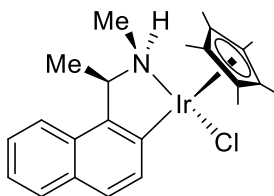

### ***1-Acetonaphthone 2***

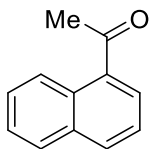

Eluent System (Chromatography): *n*-hexane:CH<sub>2</sub>Cl<sub>2</sub> (2:1); Yield: 20.4 mg (48%; *two-day reaction*); <sup>1</sup>H NMR (400 MHz, CDCl<sub>3</sub>): δ 2.75 (s, 3H, Ar(C=O)CH<sub>3</sub>), 7.48-8.74 (m, 7H, ArH); <sup>13</sup>C NMR (100 MHz, CDCl<sub>3</sub>): δ 29.93 (C(=O)CH<sub>3</sub>), 124.29 (aromatic carbon), 126.00 (aromatic carbon), 126.41 (aromatic carbon), 128.01 (aromatic carbon), 128.37 (aromatic carbon), 128.58 (aromatic carbon), 130.15 (aromatic carbon), 132.97 (aromatic carbon), 133.98 (aromatic carbon), 135.52 (aromatic carbon), 201.76 (C(=O)CH<sub>3</sub>); HRMS (ESI) *m/z* [(M+H)]<sup>+</sup> calcd for C<sub>12</sub>H<sub>11</sub>O 171.0810, found 170.0814; Anal. calcd for C<sub>12</sub>H<sub>10</sub>O: C, 84.68; H, 5.92. Found: C, 84.93; H, 5.59.

### ***Dichloro(dimethylamino)-1,2,3,4,5-pentamethylcyclopentadienyl iridium(III) 3***

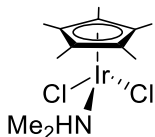

Eluent System (Chromatography): CH<sub>2</sub>Cl<sub>2</sub>:EtOAc (1:1); Yield: 24.4 mg (22%); <sup>1</sup>H NMR (400 MHz, CDCl<sub>3</sub>): δ 1.64 (s, 15H, Cp(CH<sub>3</sub>)), 2.89 (d, <sup>3</sup>J<sub>HH</sub> = 5.4 Hz, 6H, HN(CH<sub>3</sub>)<sub>2</sub>), 3.90 (br s, 1H, HN(CH<sub>3</sub>)<sub>2</sub>); <sup>13</sup>C NMR (75 MHz, CDCl<sub>3</sub>): δ 9.20 (C<sub>5</sub>(CH<sub>3</sub>)<sub>5</sub>), 43.94 (NCH<sub>3</sub>), 84.76 (C<sub>5</sub>(CH<sub>3</sub>)<sub>5</sub>); HRMS (ESI) *m/z* [*negative mode*] calcd for C<sub>12</sub>H<sub>22</sub>ClIrN 443.0759, found 443.0747.

### ***(1,2,3,4,5-Pentamethylcyclopentadienyl){(κ<sup>2</sup>-C,N)-1-[1-(N-methylimino)ethyl]naphthyl}iridium(III) chloride rac-4***

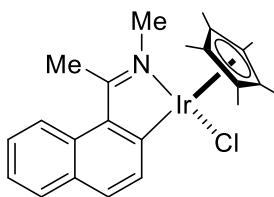

Eluent System (Chromatography): CH<sub>2</sub>Cl<sub>2</sub>:EtOAc (10:1); Yield: 2.7 mg (2%); <sup>1</sup>H NMR (400 MHz, CDCl<sub>3</sub>): δ 1.73 (s, 15H, Cp(CH<sub>3</sub>)), 2.98 (s, 3H, C(=NMe) (CH<sub>3</sub>)Ar), 3.98 (s, 3H, NCH<sub>3</sub>), 7.32-8.22 (m, 6H, ArH); <sup>13</sup>C NMR (100 MHz, CDCl<sub>3</sub>): δ 9.16 (C<sub>5</sub>(CH<sub>3</sub>)<sub>5</sub>), 20.65 (C(=N)CH<sub>3</sub>), 45.68 (NCH<sub>3</sub>), 89.34 (C<sub>5</sub>(CH<sub>3</sub>)<sub>5</sub>), 122.11 (aromatic carbon), 122.46 (aromatic carbon), 125.92 (aromatic carbon), 129.57 (aromatic carbon), 130.95 (aromatic carbon), 131.17 (aromatic carbon), 132.80 (aromatic carbon), 134.49 (aromatic carbon), 140.83 (aromatic carbon), 174.92 ((C(=N)CH<sub>3</sub>)), 180.39 (aromatic carbon); HRMS (ESI) *m/z* [*negative mode*] calcd for C<sub>23</sub>H<sub>27</sub>ClIrN 545.1461, found 545.1451; Anal. Calcd for C<sub>23</sub>H<sub>27</sub>ClIrN: C, 50.68; H, 4.99; N, 2.57. Found: C, 50.50; H, 5.07; N, 2.73.

**(1,2,3,4,5-Pentamethylcyclopentadienyl){( $\kappa^2$ -C, $[\eta^2$ -ethylene)]-1-naphthylethene}iridium(III) chloride rac-5**

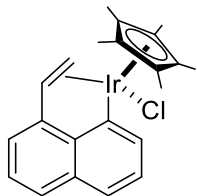

Eluent System (Chromatography): CH<sub>2</sub>Cl<sub>2</sub>; Yield: 2.6 mg (2%); <sup>1</sup>H NMR (400 MHz, CDCl<sub>3</sub>):  $\delta$  1.63 (s, 15H, Cp(CH<sub>3</sub>)), 4.04 (d, <sup>3</sup>J<sub>HH</sub> = 11.3 Hz, 1H, ArCHCHH), 4.10 (d, <sup>3</sup>J<sub>HH</sub> = 8.8 Hz, 1H, ArCHCHH), 5.32 (dd, <sup>3</sup>J<sub>HH</sub> = 8.9 Hz, <sup>3</sup>J<sub>HH</sub> = 11.2 Hz, ArCHCH<sub>2</sub>), 7.02-7.49 (m, 6H, ArH) <sup>13</sup>C NMR (100 MHz, CDCl<sub>3</sub>):  $\delta$  8.29 (C<sub>5</sub>(CH<sub>3</sub>)<sub>5</sub>), 56.16 (ArCH=CH<sub>2</sub>), 80.82 (ArCH=CH<sub>2</sub>), 99.36 (C<sub>5</sub>(CH<sub>3</sub>)<sub>5</sub>), 121.11 (aromatic carbon), 121.43 (aromatic carbon), 124.84 (aromatic carbon), 125.38 (aromatic carbon), 127.98 (aromatic carbon), 131.70 (aromatic carbon), 133.83 (aromatic carbon), 143.47 (aromatic carbon), 146.03 (aromatic carbon), 148.17 (aromatic carbon); HRMS (ESI) *m/z* [*negative mode*] calcd for C<sub>22</sub>H<sub>24</sub>ClIr 516.1196, found 516.1188; Anal. calcd for C<sub>22</sub>H<sub>24</sub>ClIr: C, 51.20; H, 4.69. Found: C, 51.45; H, 4.11.

**1-Ethynaphthalene 6**

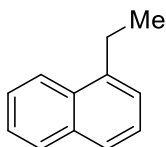

Eluent System (Chromatography): *n*-hexane; Yield: 0.3 mg (<1%); <sup>1</sup>H NMR (400 MHz, CDCl<sub>3</sub>):  $\delta$  1.40 (t, <sup>3</sup>J<sub>HH</sub> = 7.5 Hz, 3H, ArCH<sub>2</sub>CH<sub>3</sub>), 3.13 (q, <sup>3</sup>J<sub>HH</sub> = 7.5 Hz, 2H, ArCH<sub>2</sub>CH<sub>3</sub>), 7.34-8.08 (m, 7H, ArH); <sup>13</sup>C NMR (100 MHz, CDCl<sub>3</sub>):  $\delta$  15.03 (ArCH<sub>2</sub>CH<sub>3</sub>), 25.88 (ArCH<sub>2</sub>CH<sub>3</sub>), 123.72 (aromatic carbon), 124.83 (aromatic carbon), 125.37 (aromatic carbon), 125.65 (aromatic carbon), 126.37 (aromatic carbon), 128.73 (aromatic carbon), 131.77 (aromatic carbon), 133.81 (aromatic carbon), 140.27 (aromatic carbon); HRMS (ESI) *m/z* [(M+H)]<sup>+</sup> calcd for C<sub>12</sub>H<sub>13</sub> 157.1017, found 157.1017; Anal. calcd for C<sub>12</sub>H<sub>12</sub>: C, 92.26; H, 7.74. Found: C, 92.57; H, 7.50.

## B2 The Iridation Reaction of (*R*)-*N,N*-Dimethyl-1-Phenylethylamine (*R*)-L2

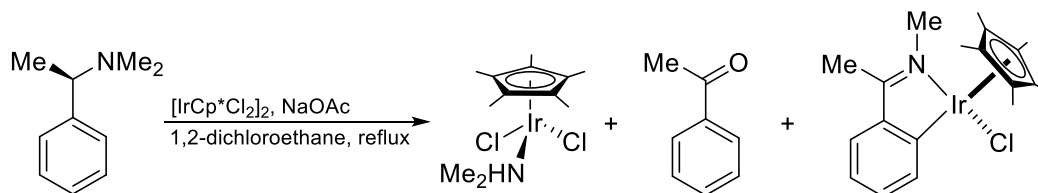

[IrCp\*Cl<sub>2</sub>]<sub>2</sub> (100 mg, 0.125 mmol) and NaOAc (41 mg, 0.50 mmol) were added to a stirring solution of (*R*)-*N,N*-dimethyl-1-phenylethylamine (*R*)-L2 (50 mg, 0.25 mmol) in 1,2-dichloroethane (5 mL). The reaction mixture was then reflux for 2 days. The crude reaction mixture was evaporated to dryness and purified directly by column chromatography on silica gel with hexane/ethyl acetate as the eluent.

### *Dichloro(dimethylamino)-1,2,3,4,5-pentamethylcyclopentadienyl iridium(III) 3*

Yield: 17% (refer to Page S5 for characterization).

### *Acetophenone 7*

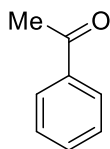

Yield: 12.3 mg (41%); <sup>1</sup>H NMR (400 MHz, CDCl<sub>3</sub>): δ 2.61 (s, 3H, CH<sub>3</sub>), 7.44-7.97 (m, 5H, ArH); <sup>13</sup>C NMR (100 MHz, CDCl<sub>3</sub>): δ 26.57 (C(=O)CH<sub>3</sub>), 128.27 (aromatic carbon), 128.54 (aromatic carbon), 133.07 (aromatic carbon), 137.12 (aromatic carbon), 198.12 (C(=O)CH<sub>3</sub>); HRMS (ESI) *m/z* [(M+H)]<sup>+</sup> calcd for C<sub>8</sub>H<sub>8</sub>O 121.0653, found 121.0649; ; Anal. calcd for C<sub>8</sub>H<sub>8</sub>O: C, 79.97; H, 6.71. Found: C, 80.13; H, 6.78.

### *(1,2,3,4,5-Pentamethylcyclopentadienyl){(κ<sup>2</sup>-C,N)-1-[1-(N-methylimino)ethyl]phenyl}iridium(III) chloride rac-8*

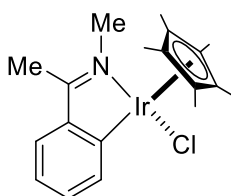

Yield: 16.1 mg (13%); <sup>1</sup>H NMR (400 MHz, CDCl<sub>3</sub>): δ 1.67 (s, 15H, Cp(CH<sub>3</sub>)), 2.51 (s, 3H, Ar(CN)CH<sub>3</sub>), 3.84 (s, 3H, N(CH<sub>3</sub>)), 6.95-7.76 (m, 4H, ArH); <sup>13</sup>C NMR (75 MHz, CDCl<sub>3</sub>): δ 8.99 (C<sub>5</sub>(CH<sub>3</sub>)<sub>5</sub>), 14.65 (C(=N)CH<sub>3</sub>), 45.09 (NCH<sub>3</sub>), 88.67 (C<sub>5</sub>(CH<sub>3</sub>)<sub>5</sub>), 121.07 (aromatic carbon), 127.34 (aromatic carbon), 130.77 (aromatic carbon), 135.10 (aromatic carbon), 148.18 (aromatic carbon), 167.89 (aromatic carbon), 180.04 (ArC(=N)CH<sub>3</sub>); HRMS (ESI) *m/z* [negative mode] calcd for C<sub>19</sub>H<sub>25</sub>ClIrN 495.1305, found 495.1292; Anal. calcd for C<sub>19</sub>H<sub>25</sub>ClIrN: C, 46.10; H, 5.09; N, 2.83. Found: C, 45.62; H, 5.38; N, 2.83.

### B3 The Cycloiridation of *N,N*-Dimethyl-1-Naphthylmethylamine **L3**

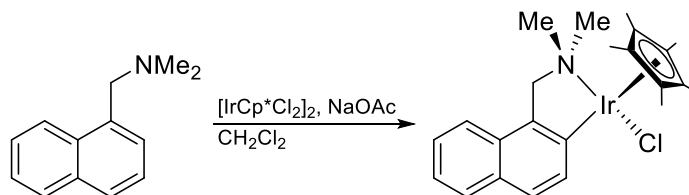

[IrCp\*Cl<sub>2</sub>]<sub>2</sub> (40 mg, 0.05 mmol) and NaOAc (10 mg, 0.12 mmol) were added to a stirring solution of *N,N*-dimethyl-1-naphthylmethylamine **L3** (0.10 mmol) in dichloromethane (3 mL). The reaction mixture was then stirred at room temperature for 24 h. The crude reaction mixture was evaporated to dryness and purified by column chromatography on silica gel with dichloromethane as the eluent.

#### *(1,2,3,4,5-Pentamethylcyclopentadienyl){(κ<sup>2</sup>-C,N)-(N,N-dimethylamino)methylnaphthyl}iridium(III) chloride rac-9*

Yield: 40 mg (73%); <sup>1</sup>H NMR (400 MHz, CD<sub>2</sub>Cl<sub>2</sub>): δ 1.65 (s, 15H, Cp(CH<sub>3</sub>)), 2.96 (s, 3H, ArCH<sub>2</sub>NMe(CH<sub>3</sub>)), 3.11 (s, 3H, ArCH<sub>2</sub>N(CH<sub>3</sub>)Me), 3.99 (d, <sup>2</sup>J<sub>HH</sub> = 13.1 Hz, 1H, ArCH<sub>2</sub>HNMe<sub>2</sub>), 4.48 (d, <sup>2</sup>J<sub>HH</sub> = 13.0 Hz, 1H, ArCH<sub>2</sub>HNMe<sub>2</sub>), 7.24-7.84 (m, 6H, ArH); <sup>13</sup>C NMR (100 MHz, CD<sub>2</sub>Cl<sub>2</sub>): δ 9.11 (C<sub>5</sub>(CH<sub>3</sub>)<sub>5</sub>), 51.83 (NCH<sub>3</sub>), 57.90 (NCH<sub>3</sub>), 70.92 (ArCH<sub>2</sub>N), 87.85 (C<sub>5</sub>(CH<sub>3</sub>)<sub>5</sub>), 122.56 (aromatic carbon), 123.18 (aromatic carbon), 124.74 (aromatic carbon), 125.06 (aromatic carbon), 128.09 (aromatic carbon), 129.82 (aromatic carbon), 130.72 (aromatic carbon), 134.48 (aromatic carbon), 141.10 (aromatic carbon), 150.86 (aromatic carbon); HRMS (ESI) *m/z* [negative mode] calcd for C<sub>23</sub>H<sub>29</sub>ClIrN 547.1618, found 547.1608; Anal. calcd for C<sub>23</sub>H<sub>29</sub>ClIrN: C, 50.49; H, 5.34; N, 2.56. Found: C, 50.52; H, 5.15; N, 2.59.



**B4 The Iridation Reaction of Deuterated *d*<sub>1</sub>-*rac*-*N,N*-Dimethyl-1-Naphthylethylamine *d*<sub>1</sub>-*rac*-L1**

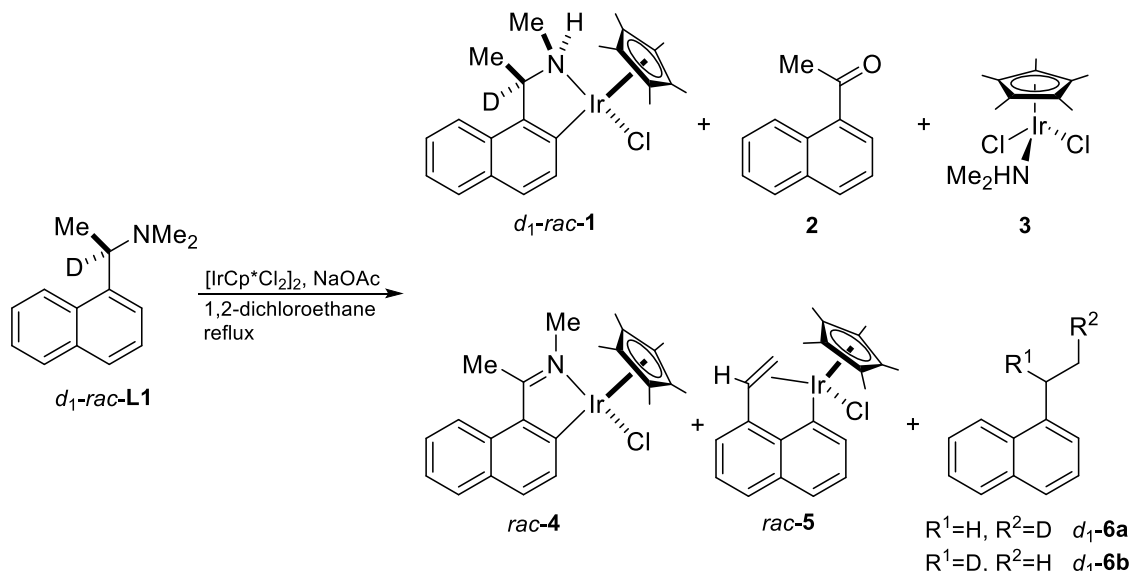

[IrCp\*Cl<sub>2</sub>]<sub>2</sub> (100 mg, 0.125 mmol) and NaOAc (41 mg, 0.50 mmol) were added to a stirring solution of *d*<sub>1</sub>-*rac*-dimethyl-1-naphthylethylamine *d*<sub>1</sub>-(*R*)-L1 (50 mg, 0.25 mmol) in 1,2-dichloroethane (5 mL). The reaction mixture was then reflux for 48 h. The crude reaction mixture was evaporated to dryness and purified directly by column chromatography on silica gel.

***d*<sub>1</sub>-*rac*-(1,2,3,4,5-Pentamethylcyclopentadienyl){κ<sup>2</sup>-C,N}-1-[1-(*N*-methylamino)-ethyl]naphthyl}iridium(III) chloride *d*<sub>1</sub>-*rac*-1**

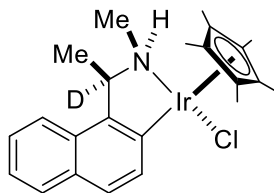

<sup>1</sup>H NMR (400 MHz, CD<sub>2</sub>Cl<sub>2</sub>): δ 1.25 (s, 3H, ArCD(CH<sub>3</sub>)), 1.68 (s, 15H, Cp(CH<sub>3</sub>)), 3.02 (d, <sup>3</sup>J<sub>HH</sub> = 6.3 Hz, 3H, NH(CH<sub>3</sub>)), 5.03 (br s, 1H, NH(CH<sub>3</sub>)), 7.21-7.75 (m, 6H, ArH); <sup>2</sup>H NMR (400 MHz, CD<sub>2</sub>Cl<sub>2</sub>): δ 4.72 (ArCD(CH<sub>3</sub>)); <sup>13</sup>C NMR (100 MHz, CD<sub>2</sub>Cl<sub>2</sub>): δ 9.37 (C<sub>5</sub>(CH<sub>3</sub>)<sub>5</sub>), 17.28 (ArCD(CH<sub>3</sub>)N), 39.54 (NCH<sub>3</sub>), 66.51 (<sup>1</sup>J<sub>CD</sub> = 20.5 Hz, ArCD(CH<sub>3</sub>)N), 87.35 (C<sub>5</sub>(CH<sub>3</sub>)<sub>5</sub>), 122.66 (aromatic carbon), 123.41 (aromatic carbon), 125.41 (aromatic carbon), 126.05 (aromatic carbon), 127.95 (aromatic carbon), 128.39 (aromatic carbon), 131.09 (aromatic carbon), 136.09 (aromatic carbon), 144.64 (aromatic carbon), 153.13 (aromatic carbon); HRMS (ESI) *m/z* [negative mode] calcd for C<sub>23</sub>H<sub>28</sub>DCIIrN 548.1681, found 548.1675.

## ***1-Acetonaphthone 2***

*Refer to Page S5 for characterization data.*

## ***Dichloro(dimethylamino)-1,2,3,4,5-pentamethylcyclopentadienyl iridium(III) 3***

*Refer to Page S5 for characterization data.*

## ***(1,2,3,4,5-Pentamethylcyclopentadienyl){( $\kappa^2$ -C,N)-1-[1-(N-methylimino)ethyl]naphthyl}iridium(III) chloride rac-4***

*Refer to Page S5 for characterization data.*

## ***(1,2,3,4,5-Pentamethylcyclopentadienyl){( $\kappa^2$ -C, $\eta^2$ -ethylene)-1-naphthylethene}iridium(III) chloride rac-5***

*Refer to Page S6 for characterization data.*

## ***d<sub>1</sub>-1-Ethynaphthalene 6a and 6b***

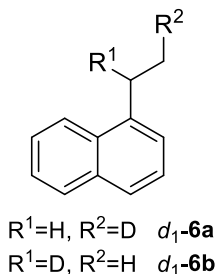

<sup>1</sup>H NMR (400 MHz, CDCl<sub>3</sub>):  $\delta$  1.40 (t, <sup>3</sup>J<sub>HH</sub> = 7.5 Hz, 2.86H, ArCH<sub>2</sub>CH<sub>3</sub>), 3.13 (q, <sup>3</sup>J<sub>HH</sub> = 7.5 Hz, 1.62H, ArCH<sub>2</sub>CH<sub>3</sub>), 7.34-8.08 (m, 7H, ArH); <sup>2</sup>H NMR (400 MHz, CDCl<sub>3</sub>):  $\delta$  1.41 (ArCH<sub>2</sub>CH<sub>2</sub>D), 3.13 (ArCHDCH<sub>3</sub>); <sup>13</sup>C NMR (100 MHz, CDCl<sub>3</sub>):  $\delta$  14.73 (<sup>1</sup>J<sub>CD</sub> = 20.6 Hz, ArCH<sub>2</sub>CH<sub>2</sub>D), 15.01 (ArCH<sub>2</sub>CH<sub>3</sub>), 25.55 (<sup>1</sup>J<sub>CD</sub> = 19.3 Hz, ArCHDCH<sub>3</sub>), 25.87 (ArCH<sub>2</sub>CH<sub>3</sub>), 123.72 (aromatic carbon), 124.83 (aromatic carbon), 125.36 (aromatic carbon), 125.65 (aromatic carbon), 126.36 (aromatic carbon), 128.72 (aromatic carbon), 131.78 (aromatic carbon), 133.83 (aromatic carbon), 140.27 (aromatic carbon); HRMS (ESI) *m/z* [(M-H)]<sup>+</sup> calcd for C<sub>12</sub>H<sub>11</sub>D 156.0924, found 156.0919.

## C NMR SPECTROSCOPY DATA

### (1,2,3,4,5-Pentamethylcyclopentadienyl){( $\kappa^2$ -*C,N*)-1-[1-(*N*-methylamino)ethyl]naphthyl}-iridium(III) chloride

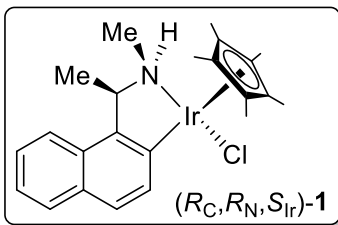

#### $^1\text{H}$ NMR spectrum

(400 MHz,  $\text{CD}_2\text{Cl}_2$ )

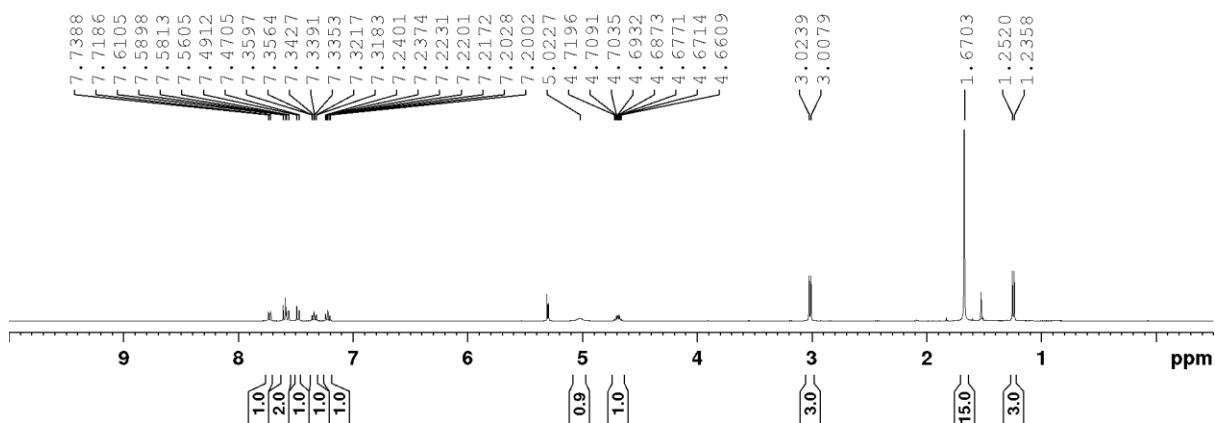

#### $^{13}\text{C}$ NMR spectrum

(100 MHz,  $\text{CD}_2\text{Cl}_2$ )

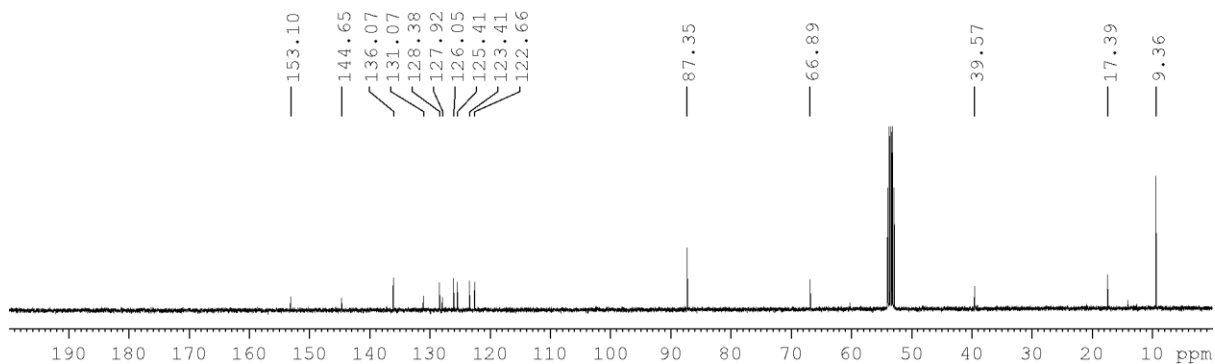

***d*<sub>1</sub>-rac-(1,2,3,4,5-Pentamethylcyclopentadienyl){( $\kappa^2$ -C,N)-1-[1-(N-methylamino)ethyl]naphthyl}iridium(III) chloride**

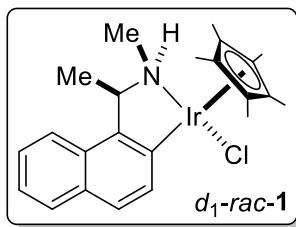

**<sup>1</sup>H NMR spectrum**

(400 MHz, CD<sub>2</sub>Cl<sub>2</sub>)

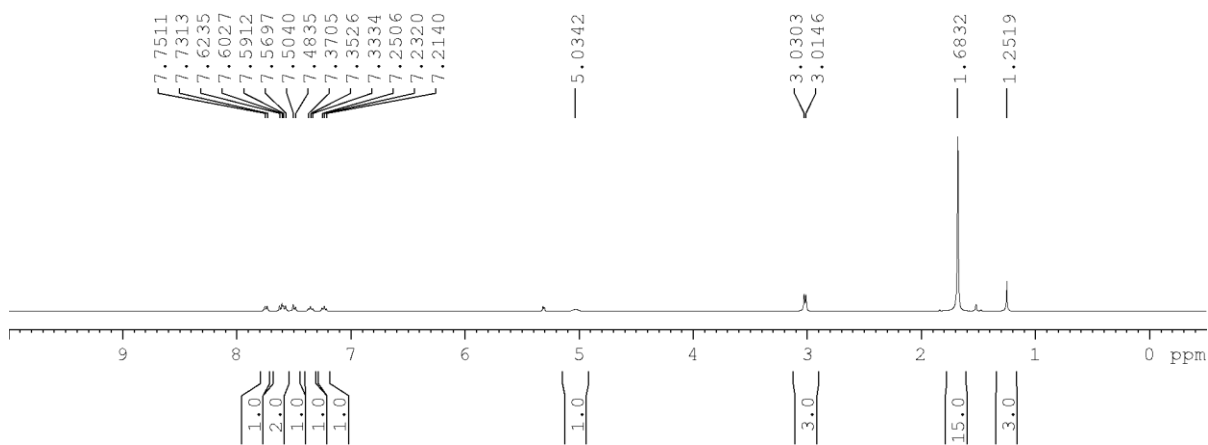

**<sup>2</sup>H NMR spectrum**

(400 MHz, CD<sub>2</sub>Cl<sub>2</sub>)

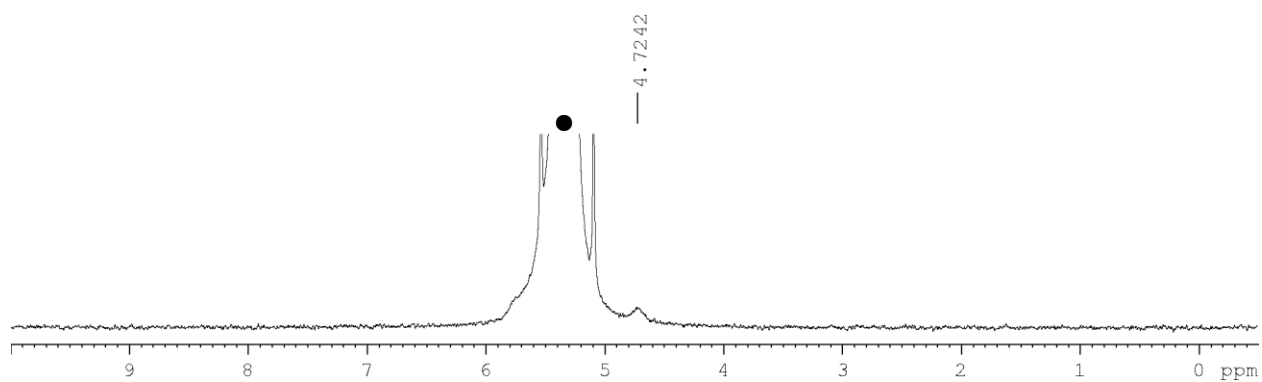

Note: The spectrum has been enlarged for clarity (● (5.32 ppm): CD<sub>2</sub>Cl<sub>2</sub>).

**$^{13}\text{C}$  NMR spectrum**

(100 MHz,  $\text{CD}_2\text{Cl}_2$ )

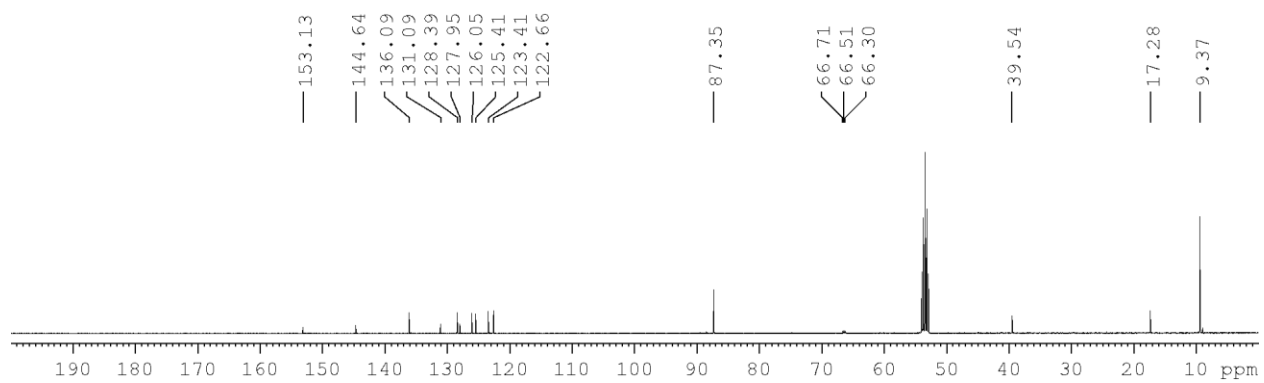

# 1-Acetonaphthone

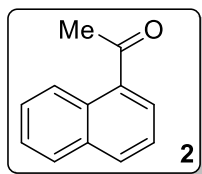

## <sup>1</sup>H NMR spectrum

(400 MHz, CDCl<sub>3</sub>)

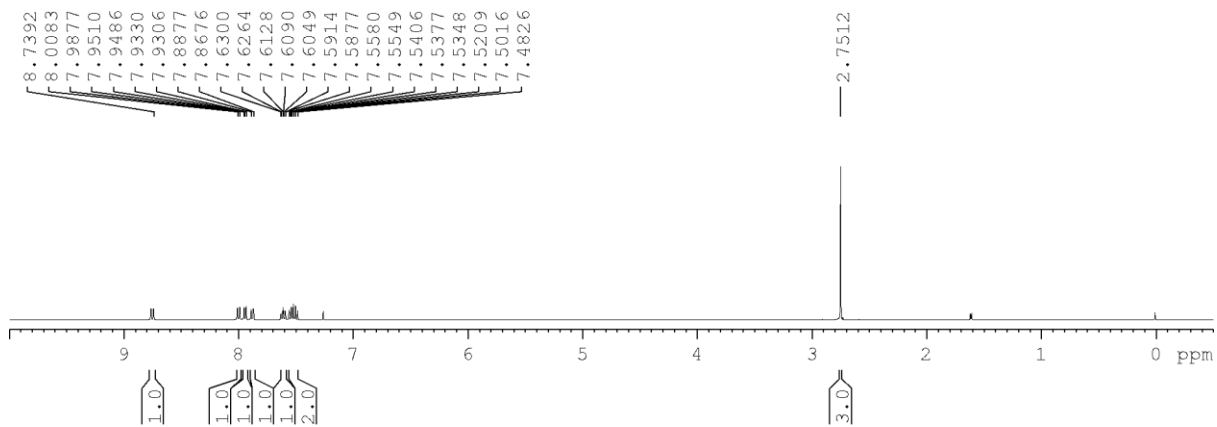

## <sup>13</sup>C NMR spectrum

(100 MHz, CDCl<sub>3</sub>)

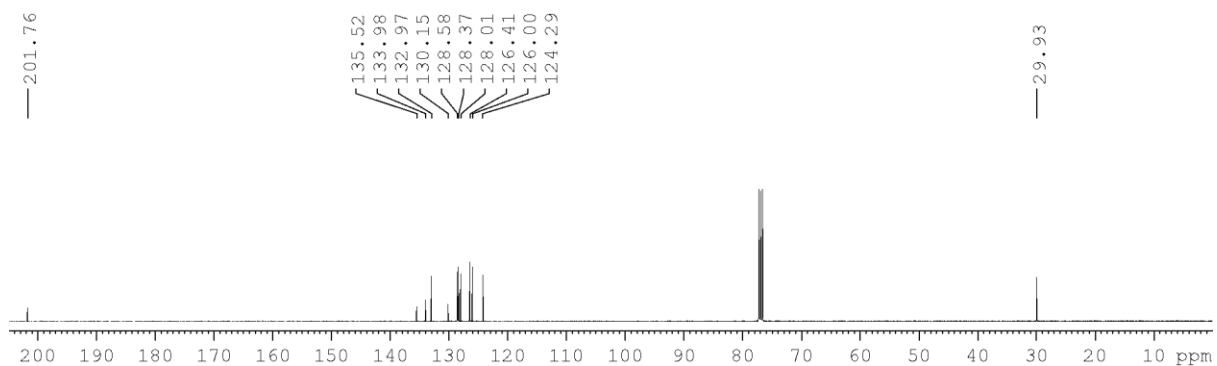

Dichloro(dimethylamino)-1,2,3,4,5-pentamethylcyclopentadienyl iridium(III)

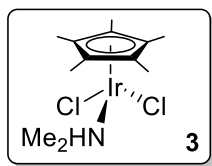

$^1\text{H}$  NMR spectrum

(400 MHz,  $\text{CDCl}_3$ )

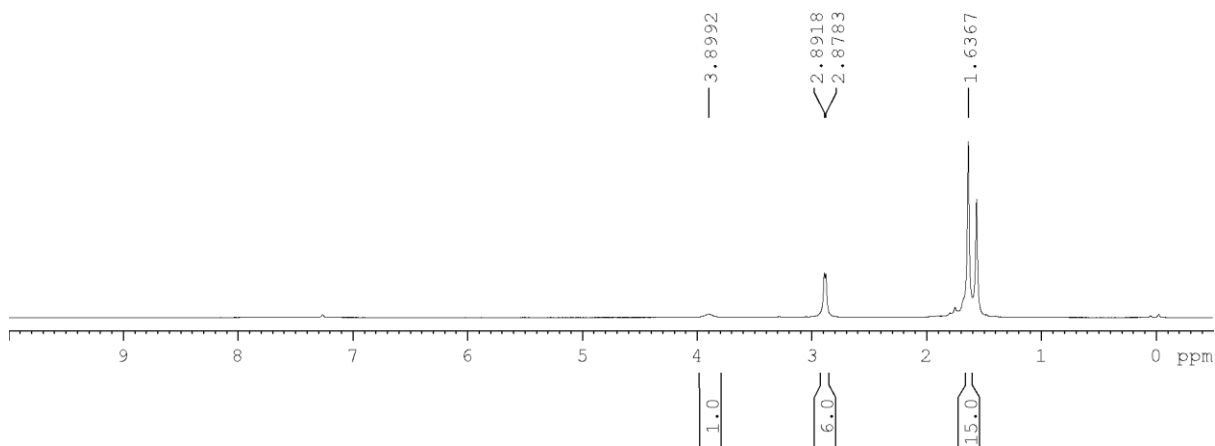

$^{13}\text{C}$  NMR spectrum

(100 MHz,  $\text{CDCl}_3$ )

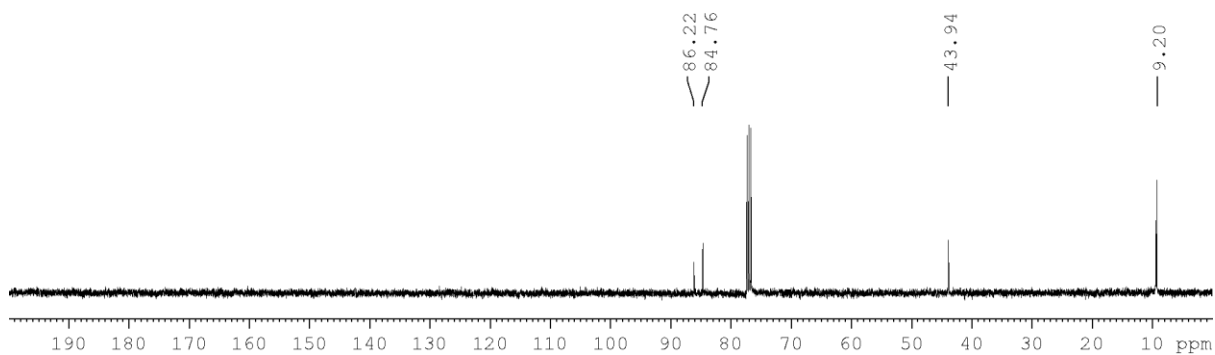

**(1,2,3,4,5-Pentamethylcyclopentadienyl){( $\kappa^2$ -C,N)-1-[1-(N-methylimino)ethyl]naphthyl}iridium(III) chloride**

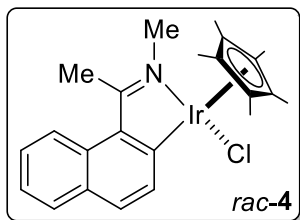

**$^1\text{H}$  NMR spectrum**

(400 MHz,  $\text{CDCl}_3$ )

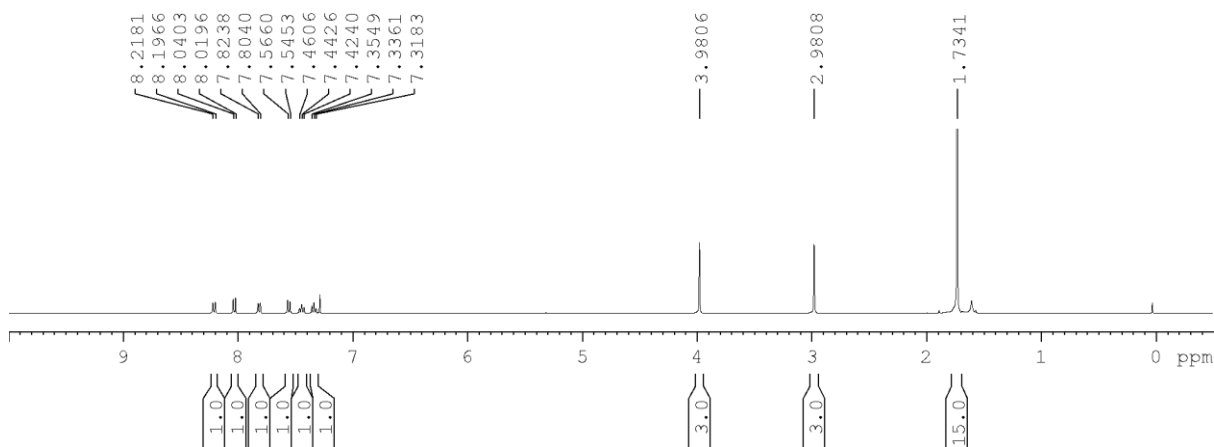

**$^{13}\text{C}$  NMR spectrum**

(100 MHz,  $\text{CDCl}_3$ )

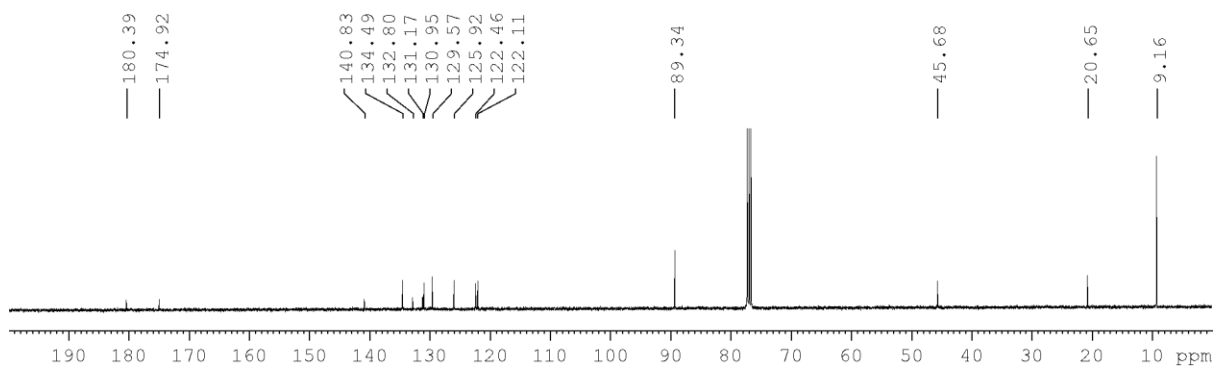



**(1,2,3,4,5-Pentamethylcyclopentadienyl){( $\kappa^2$ -C, $\eta^2$ -ethylene)-1-naphthylethene}iridium(III) chloride**

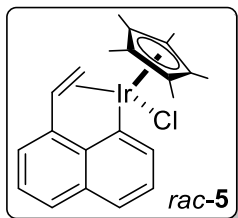

**$^1\text{H}$  NMR spectrum**

(400 MHz,  $\text{CDCl}_3$ )

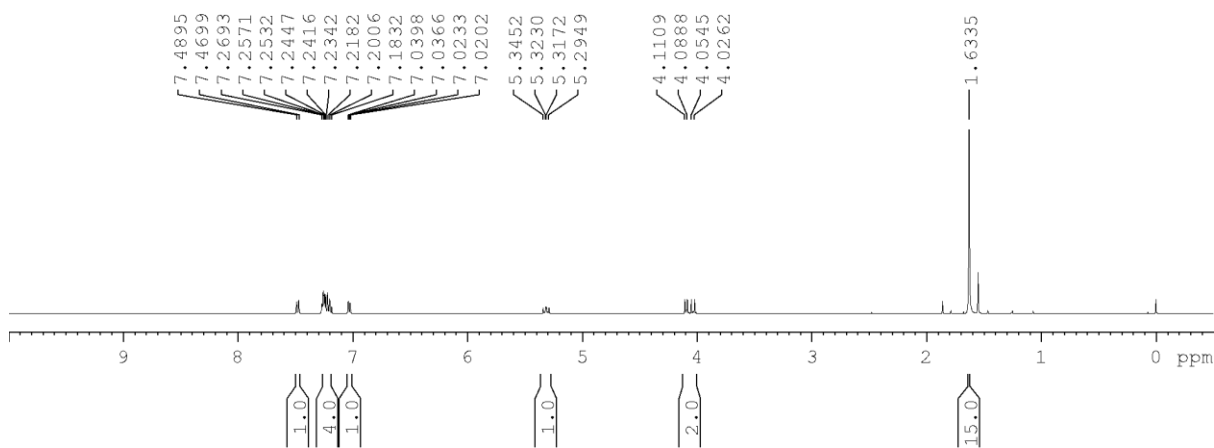

**$^{13}\text{C}$  NMR spectrum**

(100 MHz,  $\text{CDCl}_3$ )

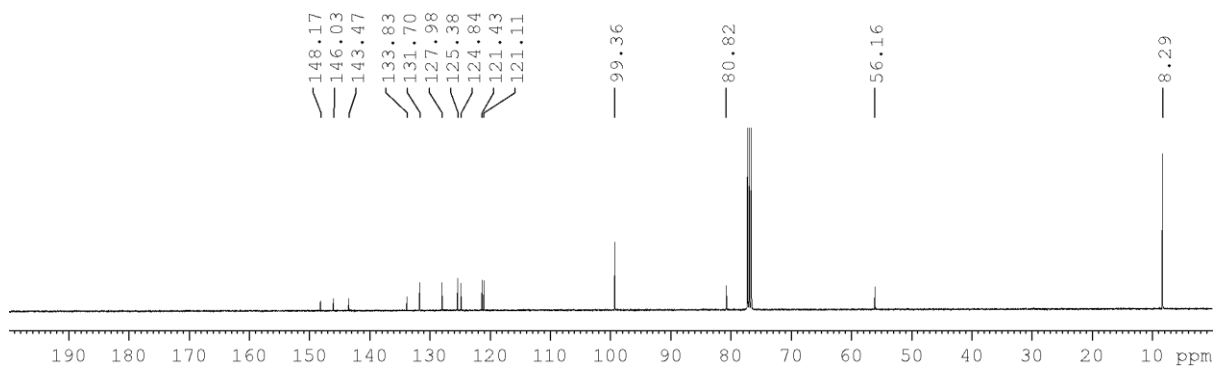

# 1-Ethynaphthalene

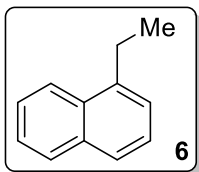

## <sup>1</sup>H NMR spectrum

(400 MHz, CDCl<sub>3</sub>)

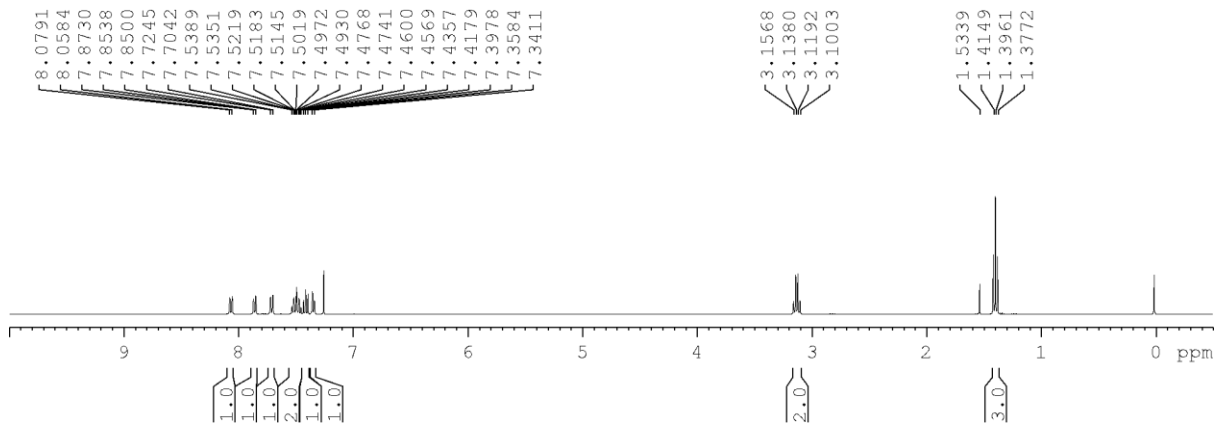

## <sup>13</sup>C NMR spectrum

(100 MHz, CDCl<sub>3</sub>)

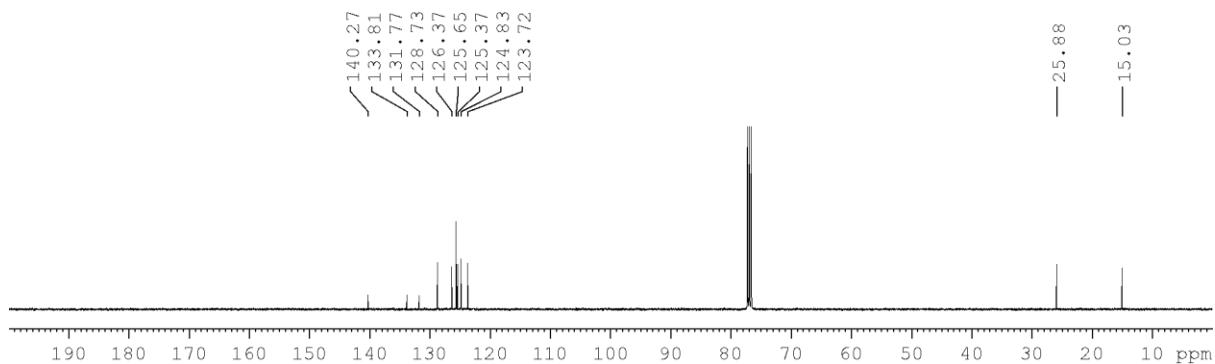

## *d*<sub>1</sub>-1-Ethynaphthalene Mixture

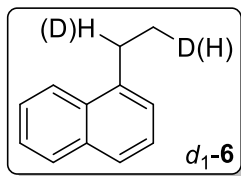

### <sup>1</sup>H NMR spectrum

(400 MHz, CDCl<sub>3</sub>)

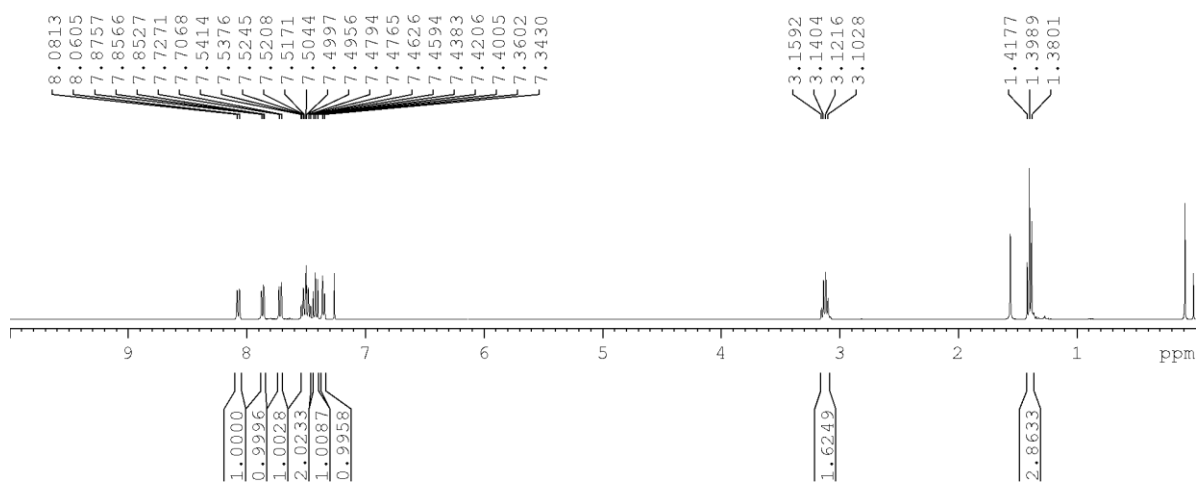

### <sup>2</sup>H NMR spectrum

(400 MHz, CDCl<sub>3</sub>)

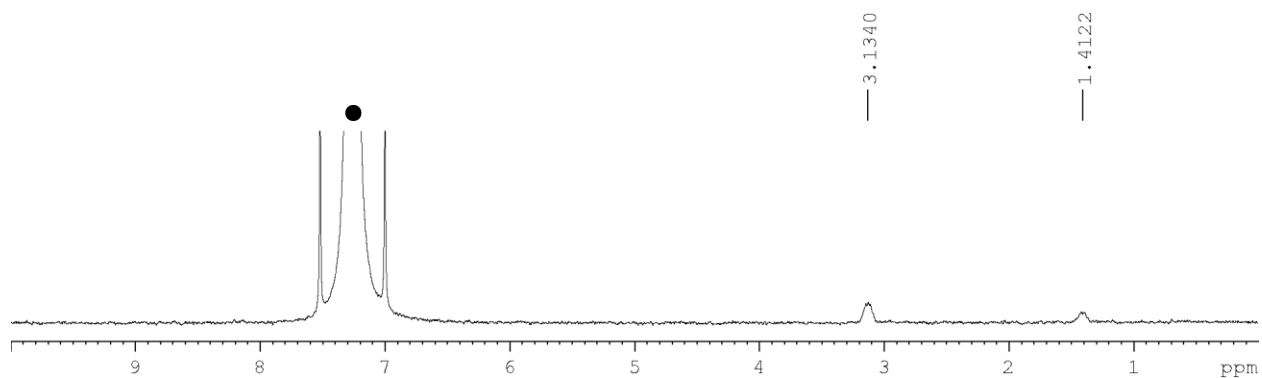

Note: The spectrum has been enlarged for clarity (● (7.26 ppm): CDCl<sub>3</sub>).

**$^{13}\text{C}$  NMR spectrum**

(100 MHz,  $\text{CDCl}_3$ )

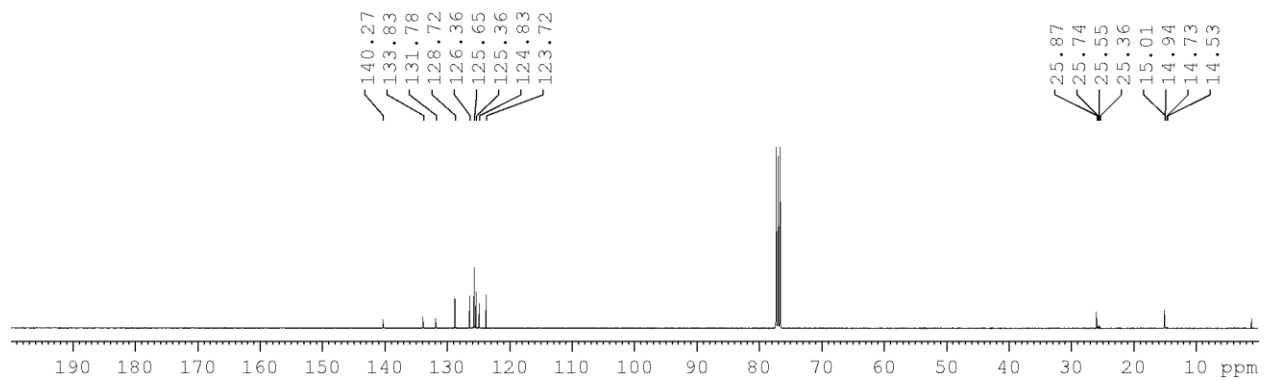

# Acetophenone

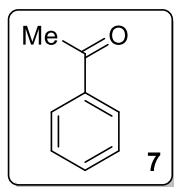

## $^1\text{H}$ NMR spectrum

(400 MHz,  $\text{CDCl}_3$ )

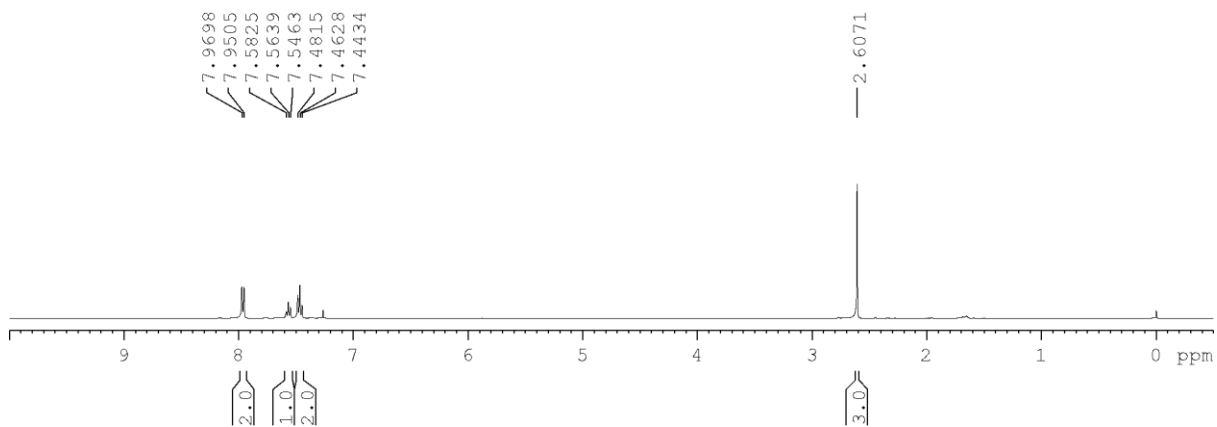

## $^{13}\text{C}$ NMR spectrum

(100 MHz,  $\text{CDCl}_3$ )

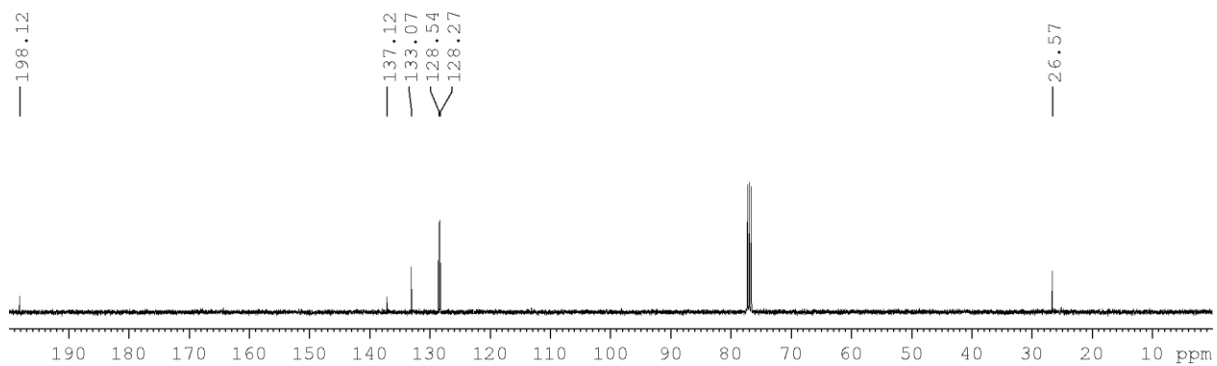

**(1,2,3,4,5-Pentamethylcyclopentadienyl){( $\kappa^2$ -C,N)-1-[1-(N-methylimino)ethyl]phenyl}iridium(III) chloride**

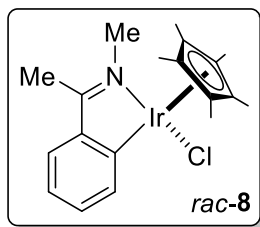

**$^1\text{H}$  NMR spectrum**

(400 MHz,  $\text{CD}_2\text{Cl}_2$ )

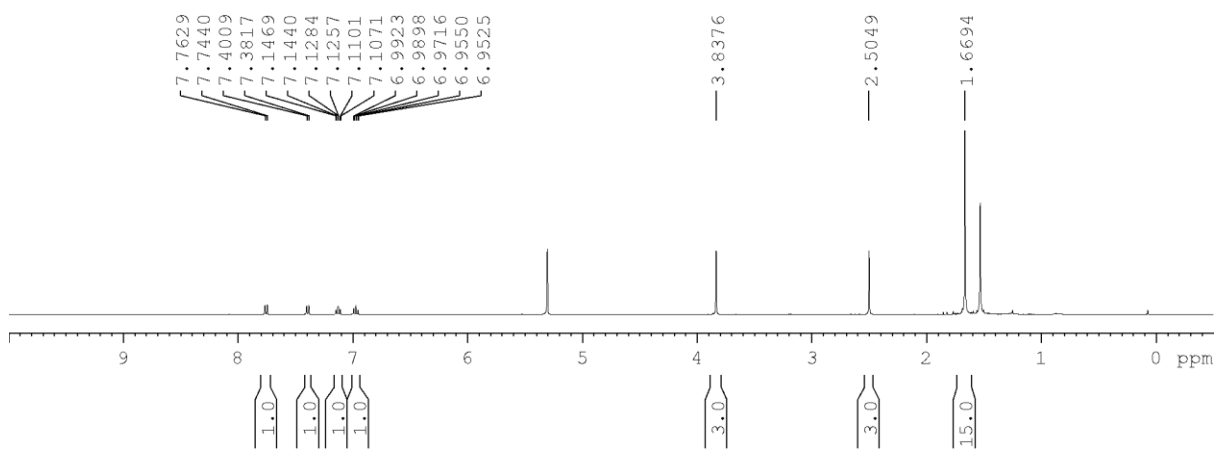

**$^{13}\text{C}$  NMR spectrum**

(100 MHz,  $\text{CD}_2\text{Cl}_2$ )

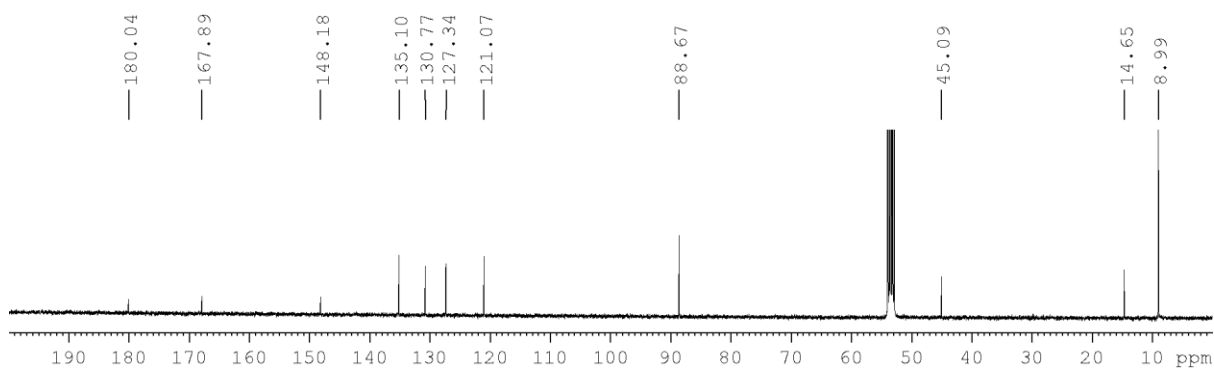

(1,2,3,4,5-Pentamethylcyclopentadienyl){( $\kappa^2$ -C,N)-(N,N-dimethylamino)methylnaphthyl}iridium(III) chloride

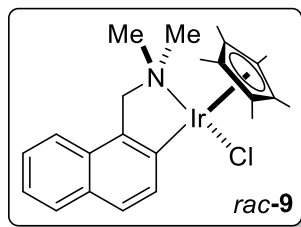

<sup>1</sup>H NMR spectrum

(400 MHz, CD<sub>2</sub>Cl<sub>2</sub>)

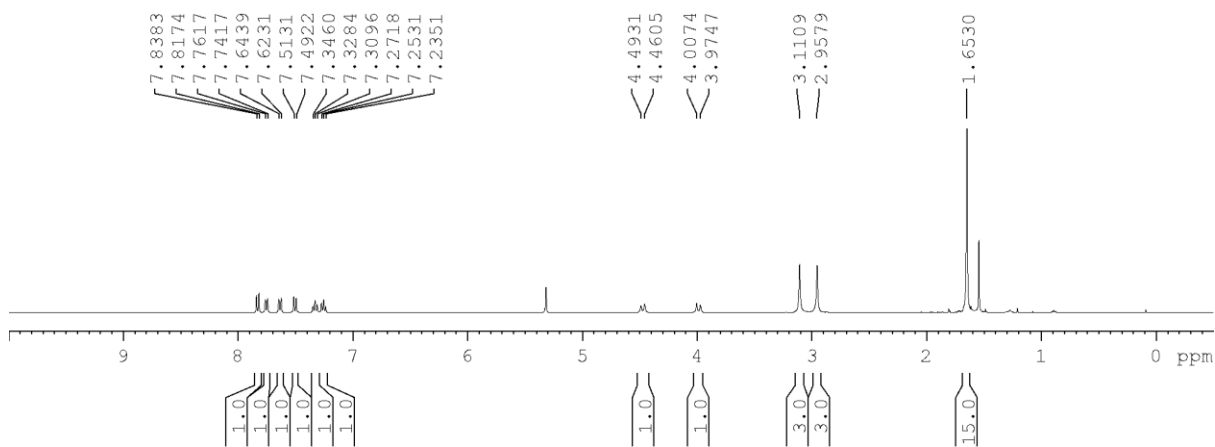

<sup>13</sup>C NMR spectrum

(100 MHz, CD<sub>2</sub>Cl<sub>2</sub>)

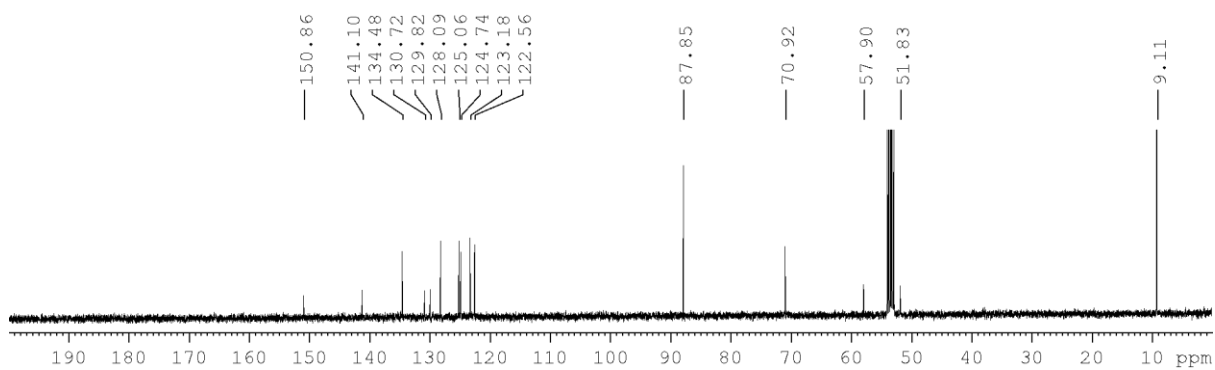

## D X-RAY CRYSTALLOGRAPHIC DATA

*(R<sub>C</sub>,R<sub>N</sub>,S<sub>Ir</sub>)-(1,2,3,4,5-Pentamethylcyclopentadienyl){(κ<sup>2</sup>-C,N)-1-[1-(N-methylamino)ethyl]naphthyl}iridium(III) chloride*

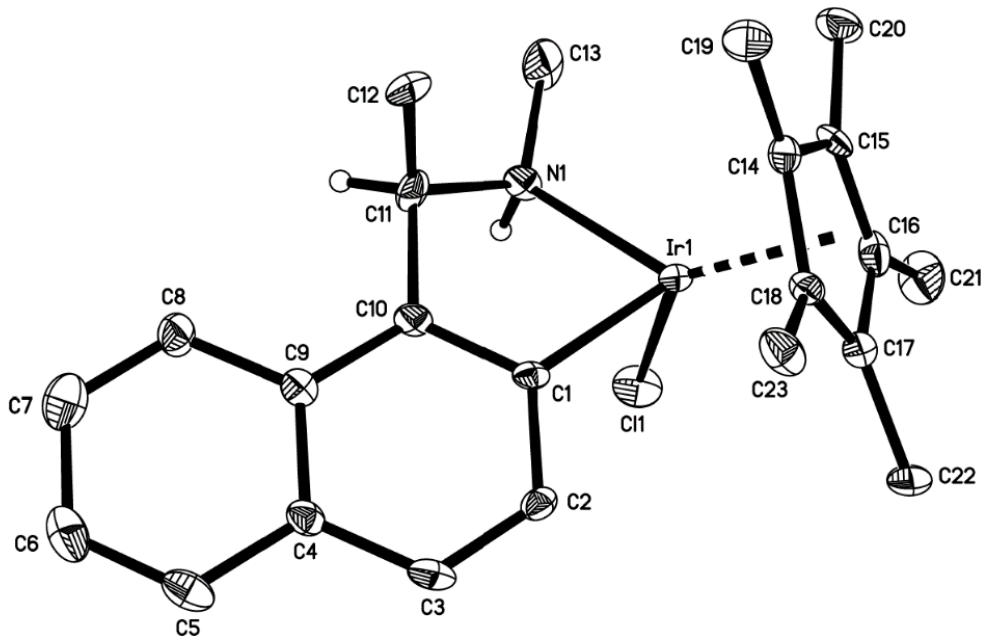

Molecular structure of cycloiridated complex *(R<sub>C</sub>,R<sub>N</sub>,S<sub>Ir</sub>)-1* with thermal ellipsoids shown at 50% probability. Hydrogen atoms except H(C11) and H(N1) are omitted for clarity. Selected bond lengths and angles: N–Ir (2.134(5) Å), C<sub>1</sub>–Ir (2.035(7) Å), Cl–Ir (2.4339(18) Å), N–Ir–C<sub>1</sub> (76.8(2)°), N–Ir–Cl (81.94(17)°), C<sub>1</sub>–Ir–Cl (86.20(19)°).

### Depository Number

CCDC Number 1815863

### Crystal Data

|                                            |                                       |
|--------------------------------------------|---------------------------------------|
| Chemical Formula                           | C <sub>23</sub> H <sub>29</sub> ClIrN |
| Formula Weight (FW), g mol <sup>-1</sup>   | 547.12                                |
| Crystal System                             | orthorhombic                          |
| Space Group                                | P 21 21 21                            |
| Temperature (K)                            | 103(2)                                |
| <i>a, b, c</i> (Å)                         | 7.8309(9), 18.449(2), 28.858(3)       |
| <i>α, β, γ</i> (°)                         | 90, 90, 90                            |
| <i>V</i> (Å <sup>3</sup> )                 | 4169.2(8)                             |
| <i>Z</i>                                   | 8                                     |
| F(000)                                     | 2144                                  |
| Radiation Type (Wavelength)                | Mo (0.71073 Å)                        |
| Absorption Coefficient (mm <sup>-1</sup> ) | 6.539                                 |
| Crystal Size (mm)                          | 0.260 × 0.340 × 0.400                 |



### Data Collection

|                                 |                                                             |
|---------------------------------|-------------------------------------------------------------|
| Theta Range for Data Collection | 5.10° to 31.08°                                             |
| Index Ranges                    | $-8 \leq h \leq 11, -26 \leq k \leq 22, -37 \leq l \leq 41$ |
| Reflections Collected           | 35193                                                       |
| Independent Reflections         | 13198 [R(int) = 0.0516]                                     |
| $T_{min}, T_{max}$              | 0.1800, 0.2810                                              |

### Refinement

|                                                     |                                                                                                        |
|-----------------------------------------------------|--------------------------------------------------------------------------------------------------------|
| Refinement Method                                   | Full-matrix least-squares on $F^2$                                                                     |
| Refinement Program                                  | SHELXL-2016/6 (Sheldrick, 2016)                                                                        |
| Function Minimized                                  | $\sum w(F_o^2 - F_c^2)^2$                                                                              |
| No. of Reflections                                  | 13198                                                                                                  |
| No. of Restraints                                   | 595                                                                                                    |
| No. of Parameters                                   | 571                                                                                                    |
| Goodness-of-Fit on $F^2$                            | 0.985                                                                                                  |
| $\Delta/\sigma_{max}$                               | 0.003                                                                                                  |
| Final R Indices                                     | 11509 data; $I > 2\sigma(I)$<br>(R1 = 0.0378, wR2 = 0.0623)<br>all data<br>(R1 = 0.0474, wR2 = 0.0646) |
| Weighting Scheme                                    | $w = 1 / [\sigma^2(F_o^2) + (0.0117P)^2]$ ,<br>where $P = (F_o^2 + 2F_c^2) / 3$                        |
| Absolute Structure Parameter                        | 0.021(8)                                                                                               |
| $r_{max}, r_{min}$ ( $e \text{ \AA}^{-3}$ )         | 2.375, -1.503                                                                                          |
| R.M.S. Deviation from Mean ( $e \text{ \AA}^{-3}$ ) | 0.166                                                                                                  |

**(1,2,3,4,5-Pentamethylcyclopentadienyl){( $\kappa^2$ -C, $[\eta^2$ -ethylene])-1-naphthylethene}iridium(III) chloride**

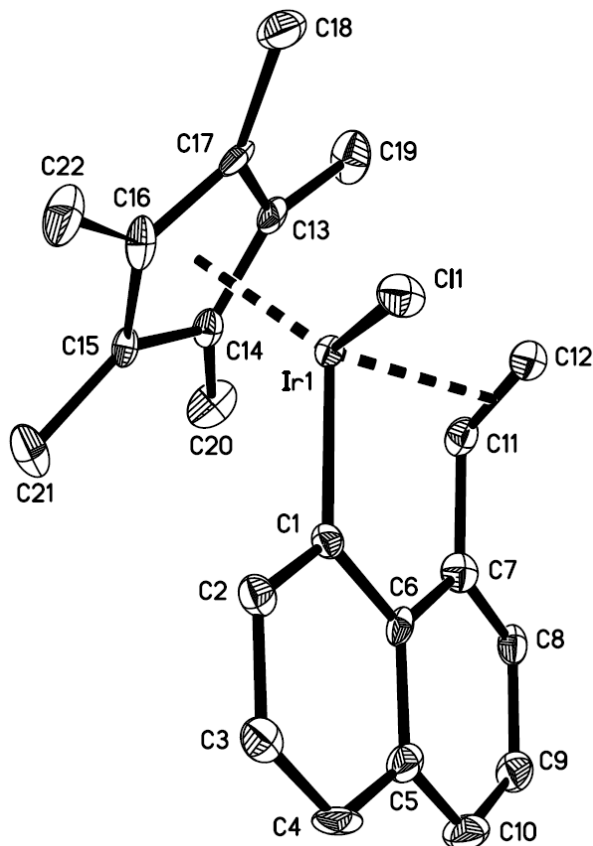

Molecular structure of cycloiridated complex *rac*-**5** with thermal ellipsoids shown at 50% probability. Hydrogen atoms are omitted for clarity. Selected bond lengths and angles: Ir–C<sub>1</sub> (2.050(6) Å), Ir–C<sub>11</sub> (2.171(7) Å), Ir–C<sub>12</sub> (2.131(7) Å), Ir–C<sub>1</sub> (2.4057(16) Å), C<sub>11</sub>–C<sub>12</sub> (1.407(10) Å), C<sub>1</sub>–Ir–C<sub>1</sub> (83.66(18)°), C<sub>11</sub>–Ir–C<sub>12</sub> (38.2(3)°), C<sub>7</sub>–C<sub>11</sub>–C<sub>12</sub> (122.1(6)°).

**Depository Number**

CCDC Number 1830655

**Crystal Data**

|                                          |                                      |
|------------------------------------------|--------------------------------------|
| Chemical Formula                         | C <sub>22</sub> H <sub>24</sub> ClIr |
| Formula Weight (FW), g mol <sup>-1</sup> | 516.06                               |
| Crystal System                           | orthorhombic                         |
| Space Group                              | P n a 2 1                            |
| Temperature (K)                          | 100(2)                               |
| <i>a, b, c</i> (Å)                       | 17.0801(5), 7.2442(2), 14.5460(5)    |
| $\alpha, \beta, \gamma$ (°)              | 90, 90, 90                           |
| <i>V</i> (Å <sup>3</sup> )               | 1799.80(10)                          |
| <i>Z</i>                                 | 4                                    |
| F(000)                                   | 1000                                 |

### Crystal Data (con't)

|                                            |                       |
|--------------------------------------------|-----------------------|
| Radiation Type (Wavelength)                | Mo (0.71073 Å)        |
| Absorption Coefficient (mm <sup>-1</sup> ) | 7.567                 |
| Crystal Size (mm)                          | 0.060 × 0.080 × 0.100 |

### Data Collection

|                                                   |                                                               |
|---------------------------------------------------|---------------------------------------------------------------|
| Theta Range for Data Collection                   | 2.38° to 34.00°                                               |
| Index Ranges                                      | -26 ≤ <i>h</i> ≤ 26, -11 ≤ <i>k</i> ≤ 11, -22 ≤ <i>l</i> ≤ 22 |
| Reflections Collected                             | 26362                                                         |
| Independent Reflections                           | 7323 [R(int) = 0.0562]                                        |
| <i>T</i> <sub>min</sub> , <i>T</i> <sub>max</sub> | 0.5180, 0.6600                                                |

### Refinement

|                                                          |                                                                                                                                                   |
|----------------------------------------------------------|---------------------------------------------------------------------------------------------------------------------------------------------------|
| Refinement Method                                        | Full-matrix least-squares on F <sup>2</sup>                                                                                                       |
| Refinement Program                                       | SHELXL-2016/6 (Sheldrick, 2016)                                                                                                                   |
| Function Minimized                                       | Σ w(F <sub>o</sub> <sup>2</sup> - F <sub>c</sub> <sup>2</sup> ) <sup>2</sup>                                                                      |
| No. of Reflections                                       | 7323                                                                                                                                              |
| No. of Restraints                                        | 1                                                                                                                                                 |
| No. of Parameters                                        | 223                                                                                                                                               |
| Goodness-of-Fit on F <sup>2</sup>                        | 1.069                                                                                                                                             |
| Final R Indices                                          | 5966 data; I > 2σ(I)<br>(R1 = 0.0328, wR2 = 0.0558)<br>all data<br>(R1 = 0.0490, wR2 = 0.0604)                                                    |
| Weighting Scheme                                         | w = 1 / [σ <sup>2</sup> (F <sub>o</sub> <sup>2</sup> ) + 1.6661P],<br>where P = (F <sub>o</sub> <sup>2</sup> + 2F <sub>c</sub> <sup>2</sup> ) / 3 |
| r <sub>max</sub> , r <sub>min</sub> (e Å <sup>-3</sup> ) | 1.934, -1.385                                                                                                                                     |
| R.M.S. Deviation from Mean (e Å <sup>-3</sup> )          | 0.178                                                                                                                                             |

*(1,2,3,4,5-Pentamethylcyclopentadienyl){(κ<sup>2</sup>-C,N)-(N,N-dimethylamino)methylnaphthyl}iridium(III) chloride*

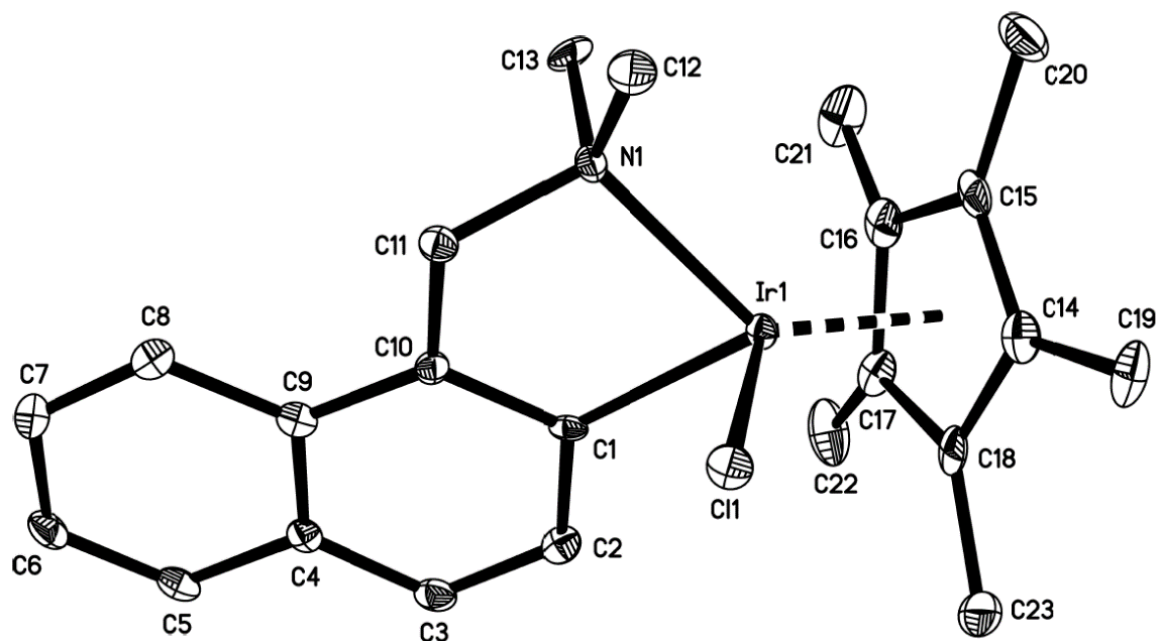

Molecular structure of cycloiridated complex *rac-9* with thermal ellipsoids shown at 50% probability. Hydrogen atoms are omitted for clarity. Selected bond lengths and angles: N–Ir (2.192(5) Å), C<sub>1</sub>–Ir (2.043(6)Å), Cl–Ir (2.4380(15) Å), N–Ir–C<sub>1</sub> (78.5(2)°), N–Ir–Cl (85.90(14)°), C<sub>1</sub>–Ir–Cl (87.82(16)°).

*Depository Number*

CCDC Number 1815864

*Crystal Data*

|                                            |                                       |
|--------------------------------------------|---------------------------------------|
| Chemical Formula                           | C <sub>23</sub> H <sub>29</sub> ClIrN |
| Formula Weight (FW), g mol <sup>-1</sup>   | 547.12                                |
| Crystal System                             | monoclinic                            |
| Space Group                                | P 1 21 1                              |
| Temperature (K)                            | 103(2)                                |
| <i>a, b, c</i> (Å)                         | 8.5640(5), 13.4034(8), 9.7175(6)      |
| <i>α, β, γ</i> (°)                         | 90, 114.7655(8), 90                   |
| <i>V</i> (Å <sup>3</sup> )                 | 1012.85(11)                           |
| <i>Z</i>                                   | 2                                     |
| F(000)                                     | 536                                   |
| Radiation Type (Wavelength)                | Mo (0.71073 Å)                        |
| Absorption Coefficient (mm <sup>-1</sup> ) | 6.730                                 |
| Crystal Size (mm)                          | 0.120 × 0.180 × 0.200                 |

### Data Collection

|                                 |                                                              |
|---------------------------------|--------------------------------------------------------------|
| Theta Range for Data Collection | 2.76° to 30.50°                                              |
| Index Ranges                    | $-12 \leq h \leq 12, -19 \leq k \leq 19, -13 \leq l \leq 13$ |
| Reflections Collected           | 5788                                                         |
| $T_{min}, T_{max}$              | 0.3460, 0.4990                                               |

### Refinement

|                                                     |                                                                                                       |
|-----------------------------------------------------|-------------------------------------------------------------------------------------------------------|
| Refinement Method                                   | Full-matrix least-squares on $F^2$                                                                    |
| Refinement Program                                  | SHELXL-2013 (Sheldrick, 2013)                                                                         |
| Function Minimized                                  | $\Sigma w(F_o^2 - F_c^2)^2$                                                                           |
| No. of Reflections                                  | 5788                                                                                                  |
| No. of Restraints                                   | 1                                                                                                     |
| No. of Parameters                                   | 243                                                                                                   |
| Goodness-of-Fit on $F^2$                            | 0.894                                                                                                 |
| Final R Indices                                     | 5524 data; $I > 2\sigma(I)$<br>(R1 = 0.0253, wR2 = 0.0533)<br>all data<br>(R1 = 0.0267, wR2 = 0.0538) |
| Weighting Scheme                                    | $w = 1 / [\sigma^2(F_o^2)]$ , where $P = (F_o^2 + 2F_c^2) / 3$                                        |
| $r_{max}, r_{min}$ ( $e \text{ \AA}^{-3}$ )         | 1.447, -1.865                                                                                         |
| R.M.S. Deviation from Mean ( $e \text{ \AA}^{-3}$ ) | 0.145                                                                                                 |
